# Supplementary material for: Inhibition of the bone morphogenetic protein pathway suppresses tumor growth through downregulation of epidermal growth factor receptor in MEK/ERK‐dependent colorectal cancer
Source: PubMed Central journal article supplement — Cancer Sci. 2023 Jun 25;114(9):3636–48. doi: 10.1111/cas.15882 (PMC10475764; doi:10.1111/cas.15882), 2023-06-25
Supplement: CAS-114-3636-s001.pdf [file CAS-114-3636-s001.pdf]

Figure S1

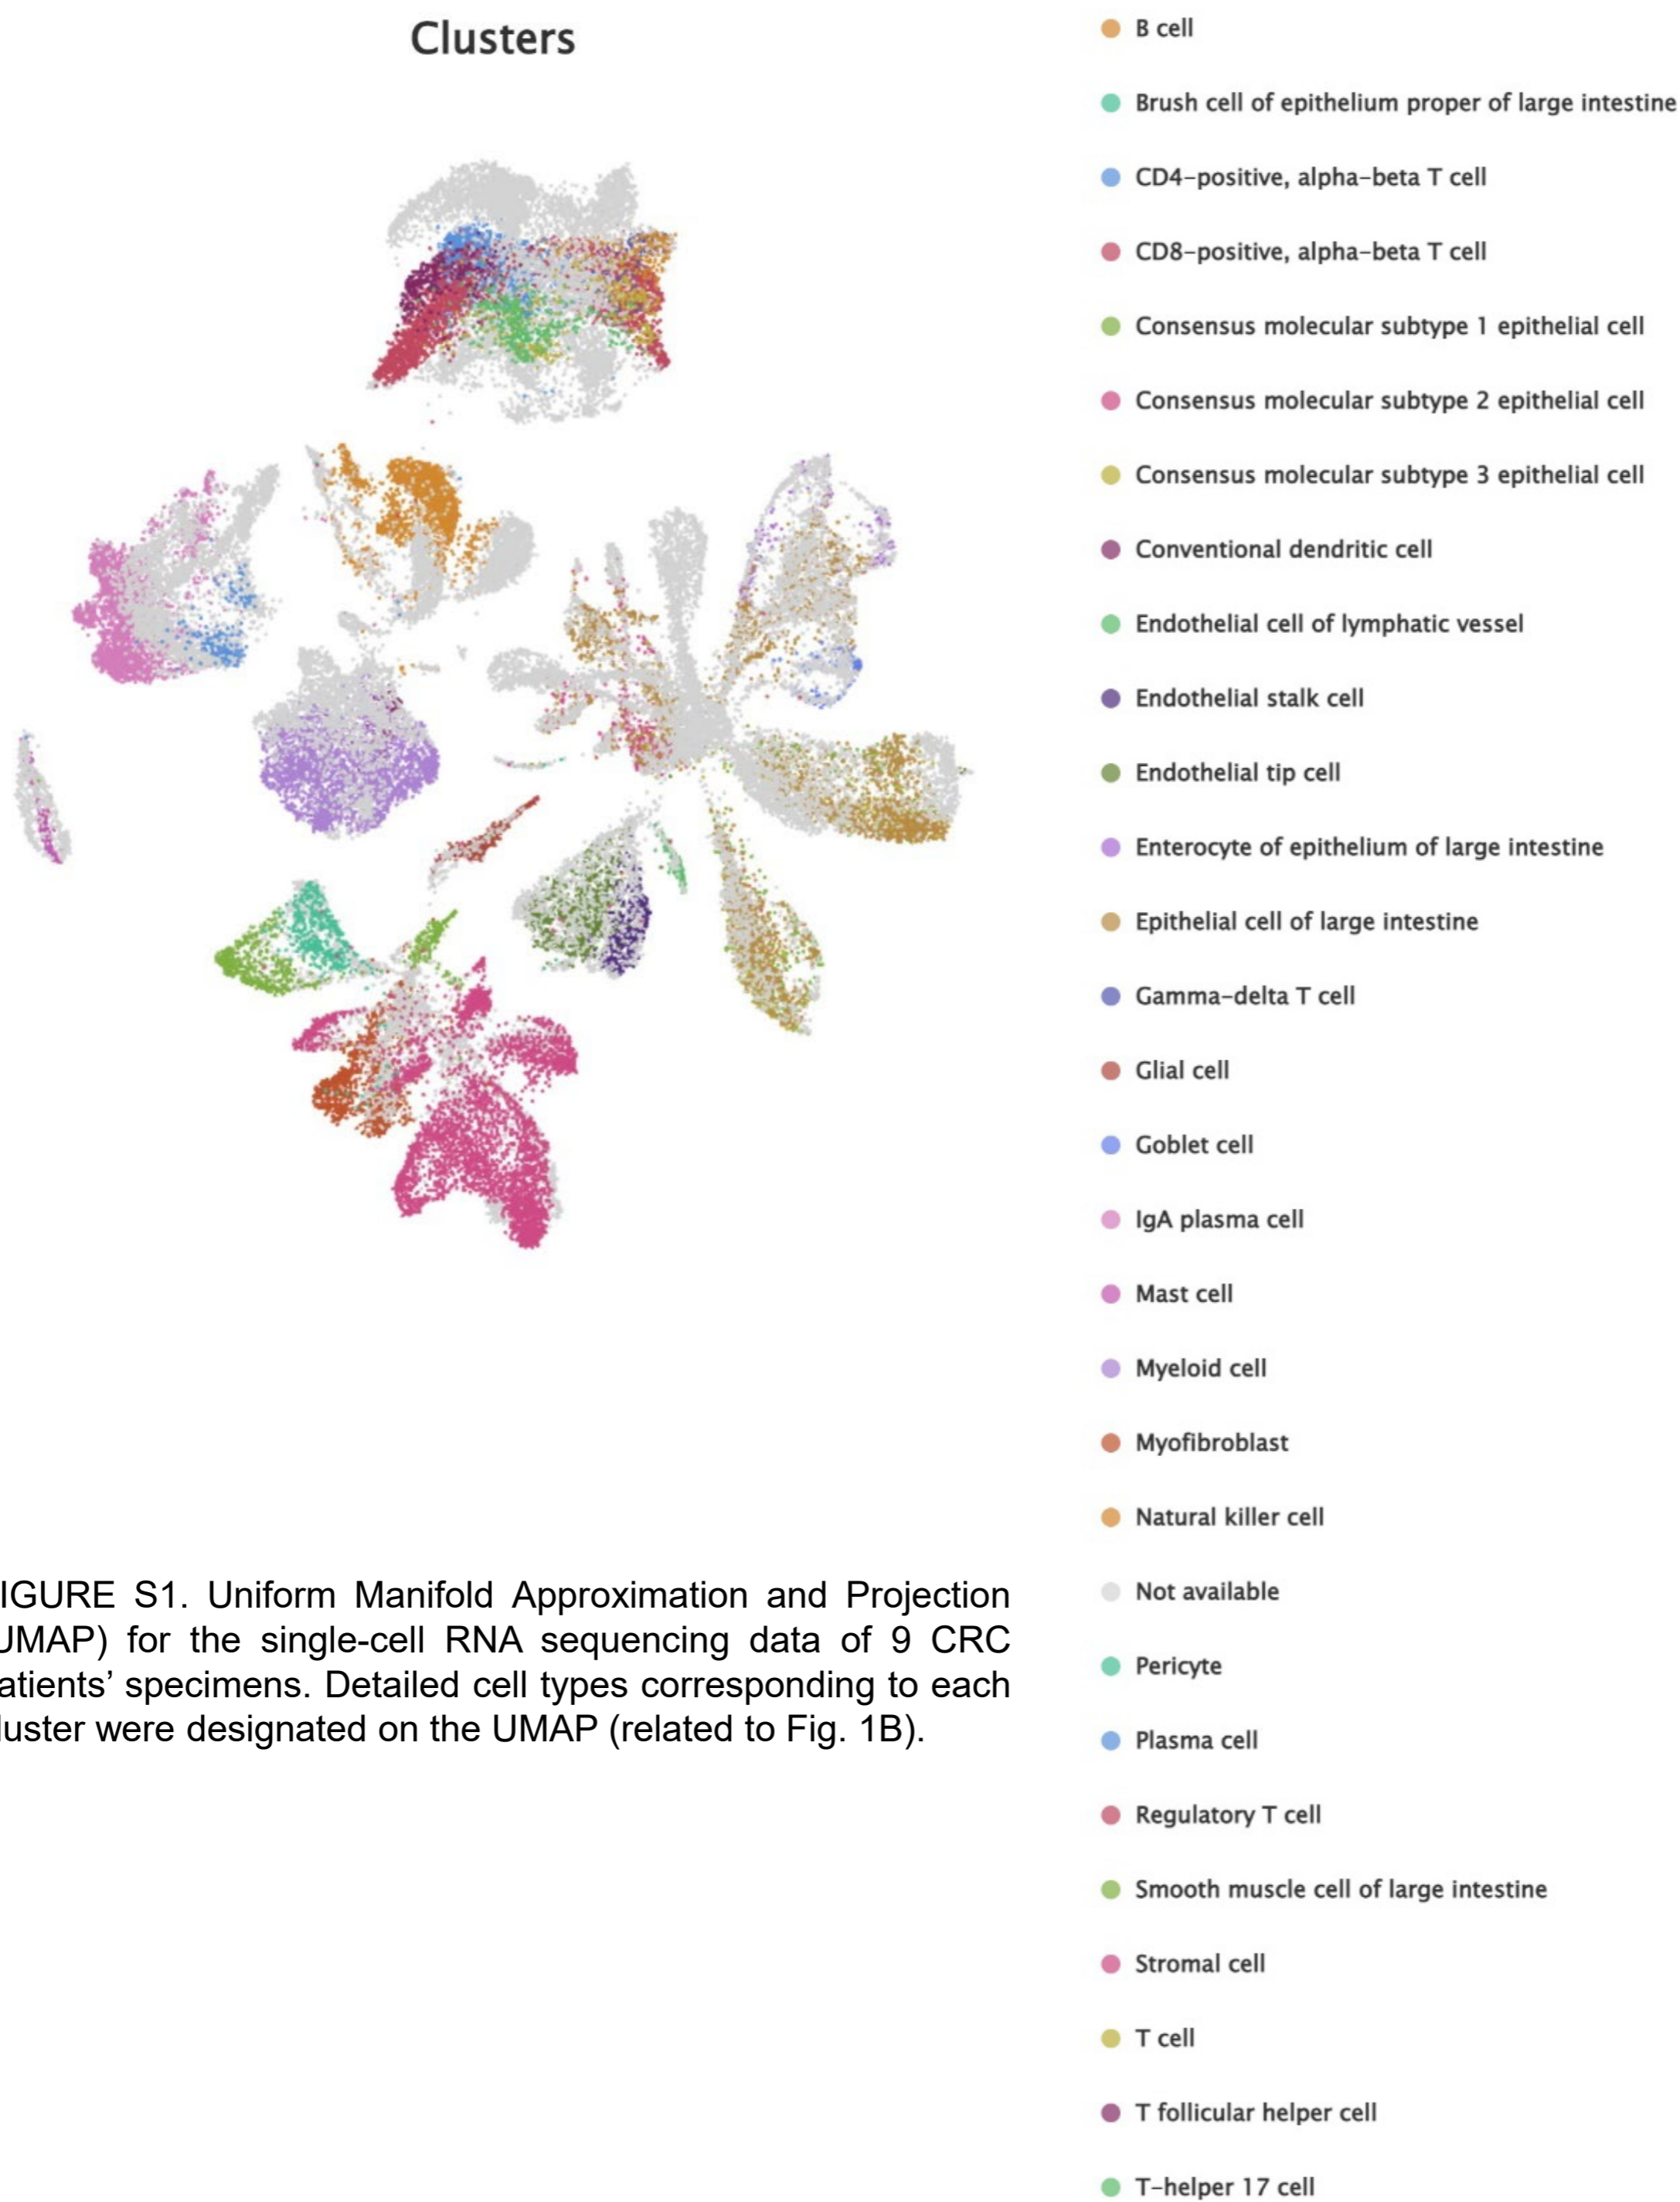

FIGURE S1. Uniform Manifold Approximation and Projection (UMAP) for the single-cell RNA sequencing data of 9 CRC patients' specimens. Detailed cell types corresponding to each cluster were designated on the UMAP (related to Fig. 1B).

Figure S2

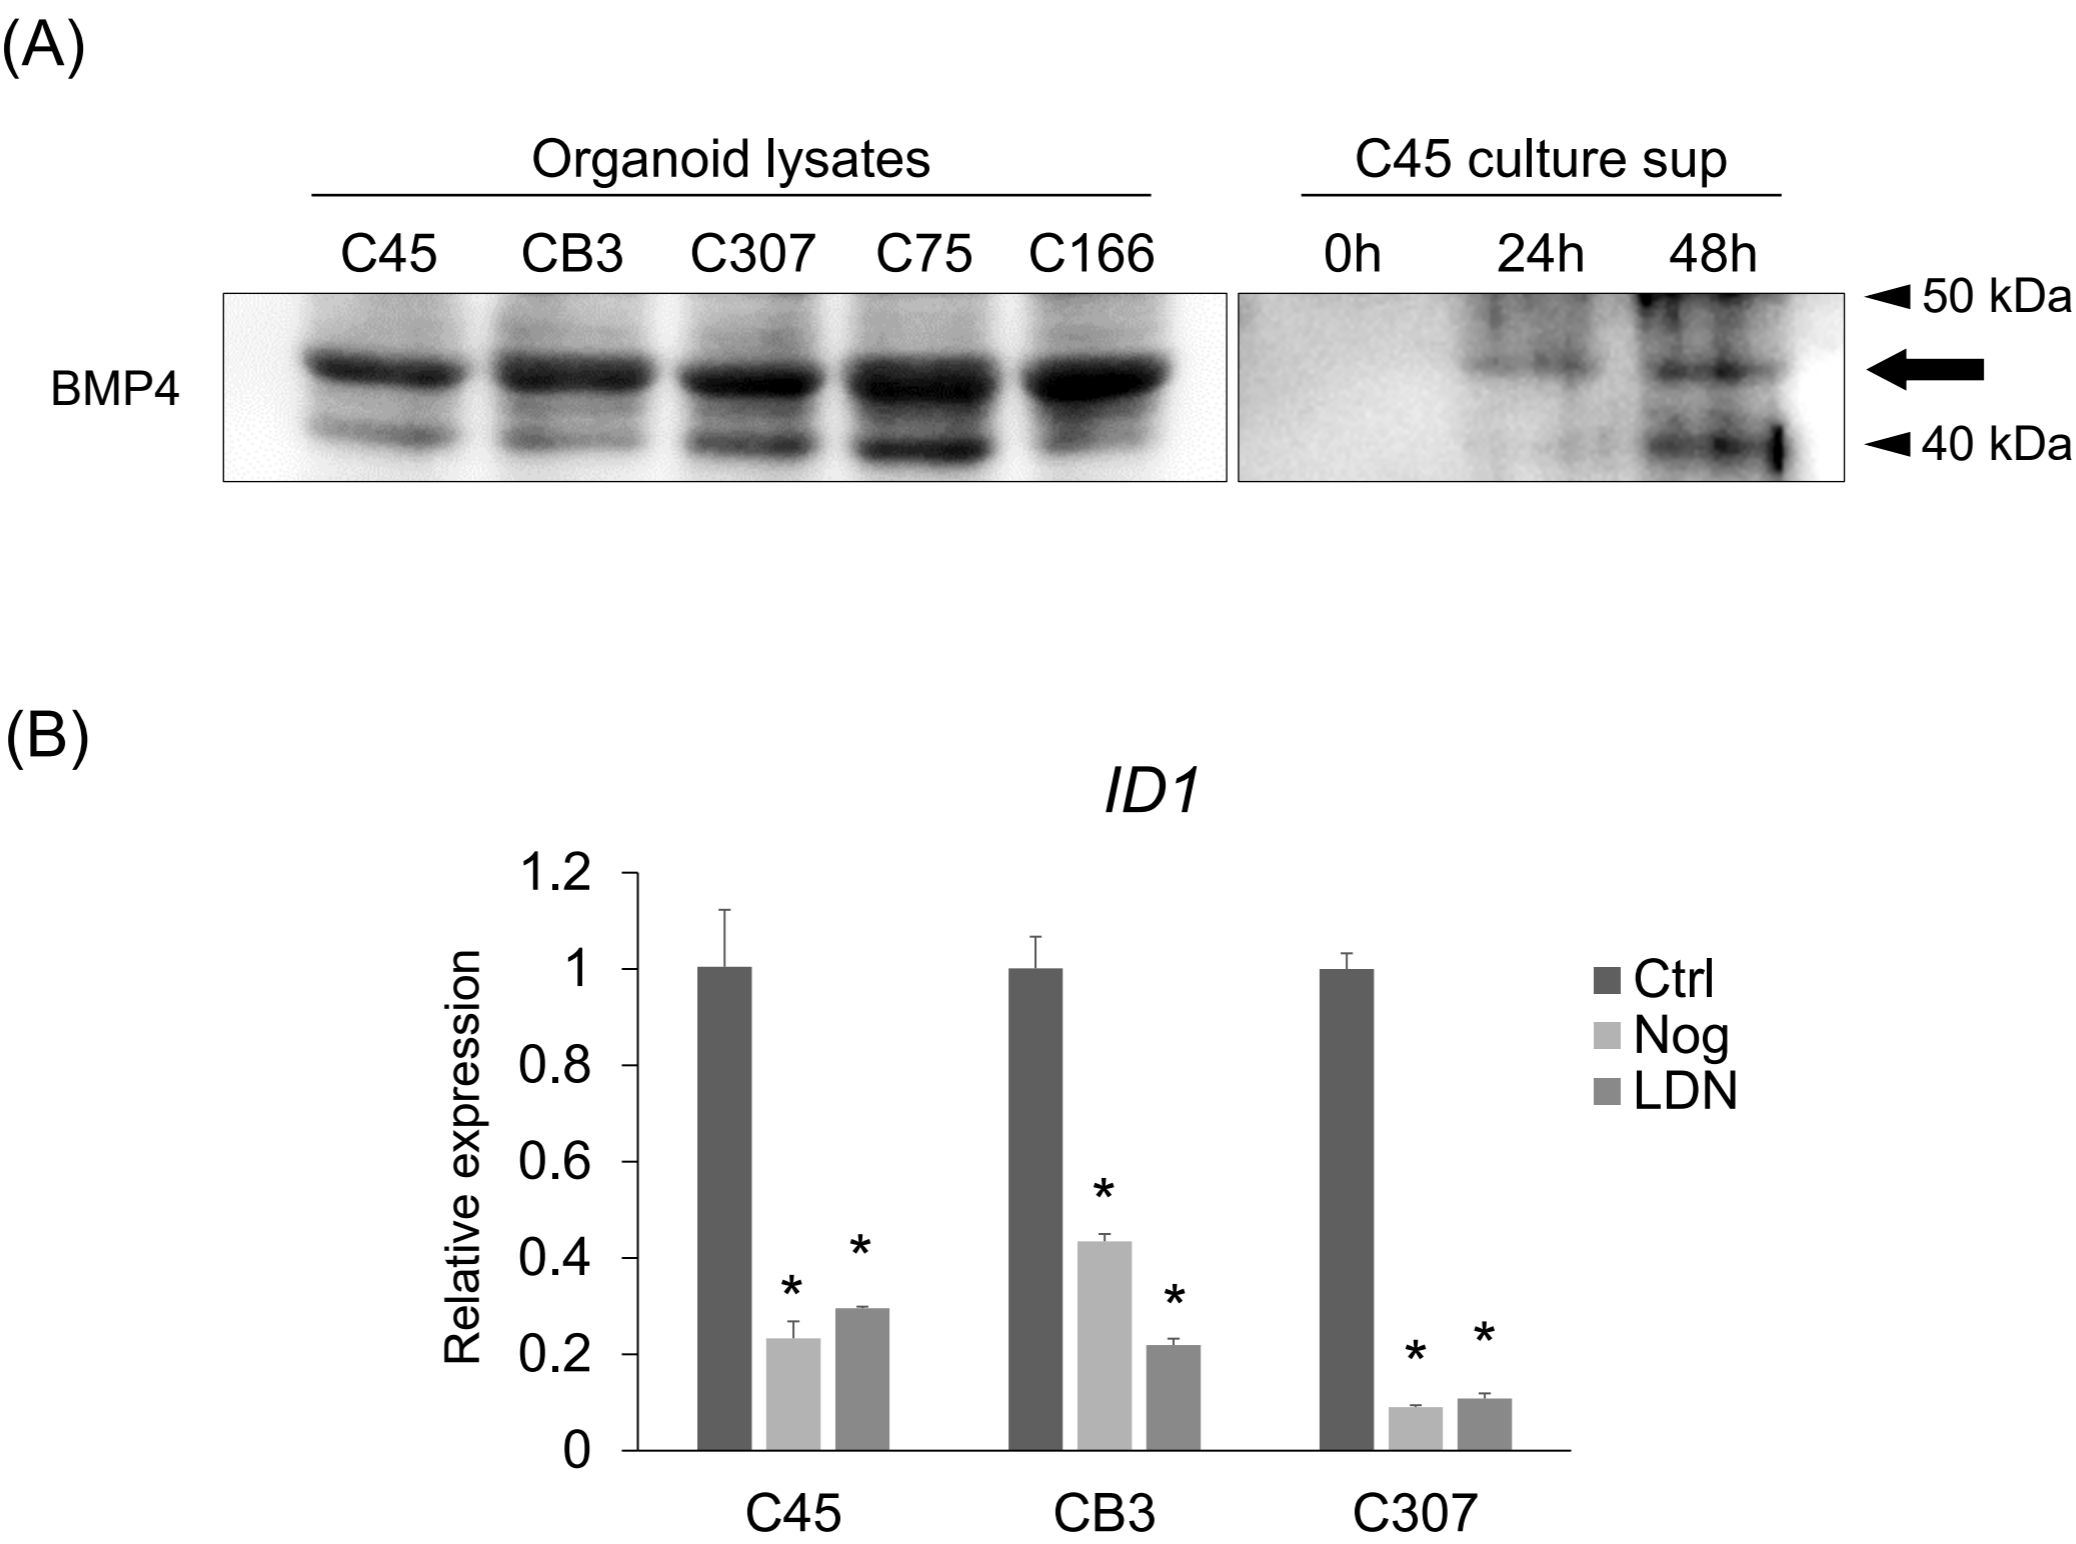

FIGURE S2. **A**, Immunoblotting analysis of CRC organoid lysates (left) and concentrated culture supernatant of C45 (right). Arrow indicates the band size for the BMP4 precursor, a monitoring protein for the secreted mature-BMP4 ligands. Proteins were detected with indicated antibodies. **B**, Gene expression of *ID1* in CRC organoids treated with Noggin (Nog) or LDN. The expression level was normalized to control (Ctrl) in each organoid. N = 3 for each condition. Data are presented as mean + SD. Statistical comparisons were made for each control condition. \* P < 0.05, t-test with Bonferroni correction.

Figure S3

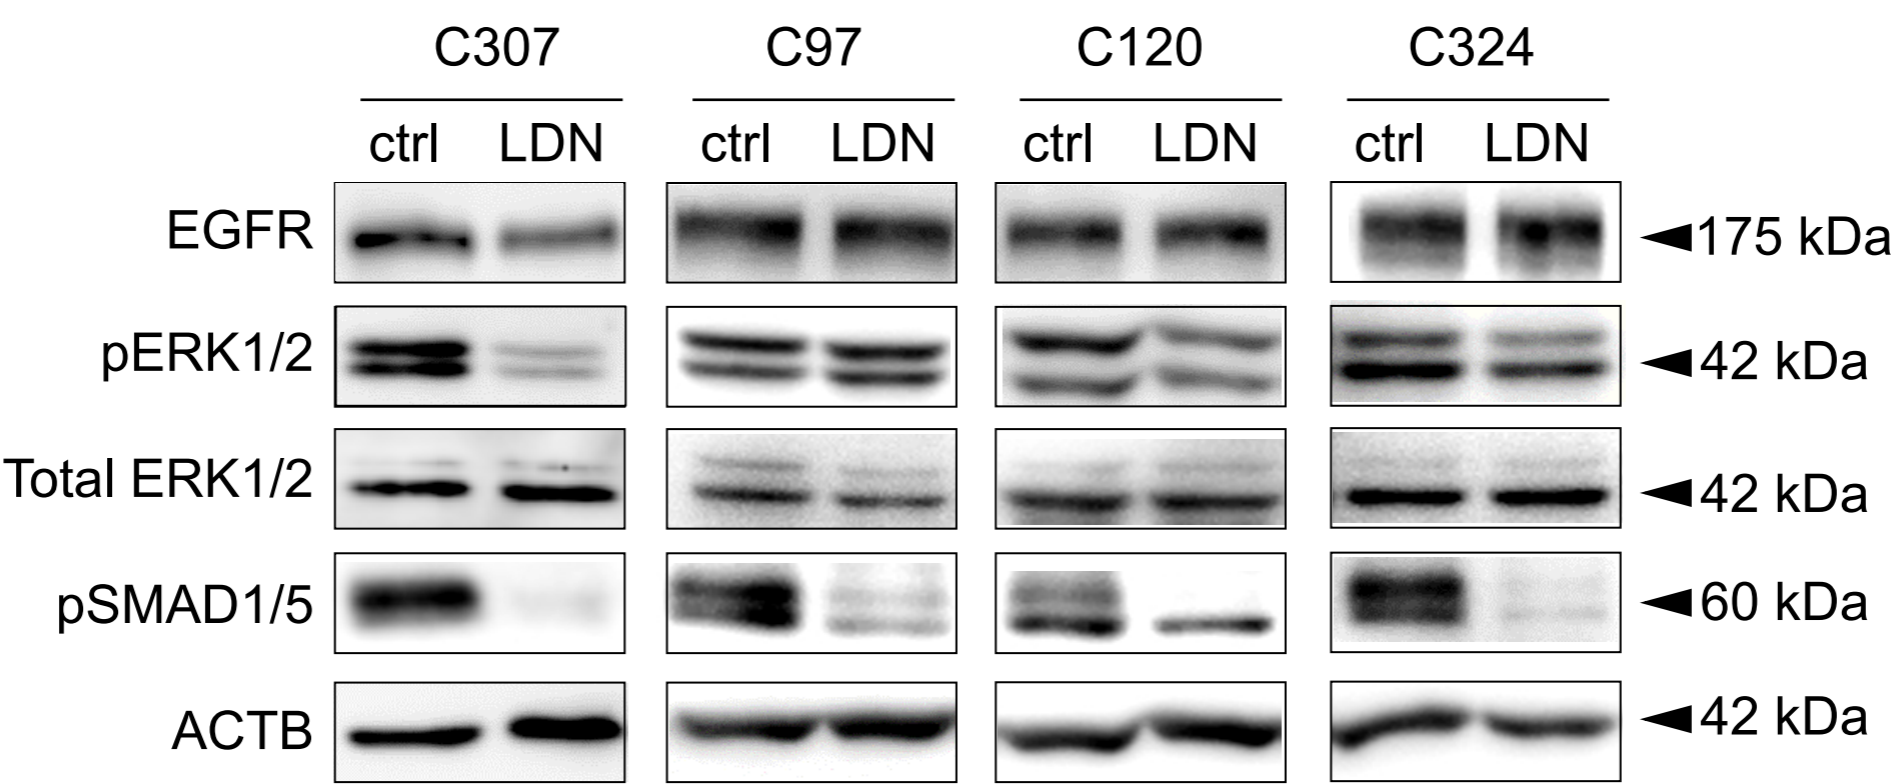

FIGURE S3. Immunoblotting analysis of CRC organoids cultured in the presence (LDN) or absence (ctrl) of 0.1 μM LDN. Proteins were detected with indicated antibodies.

Figure S4

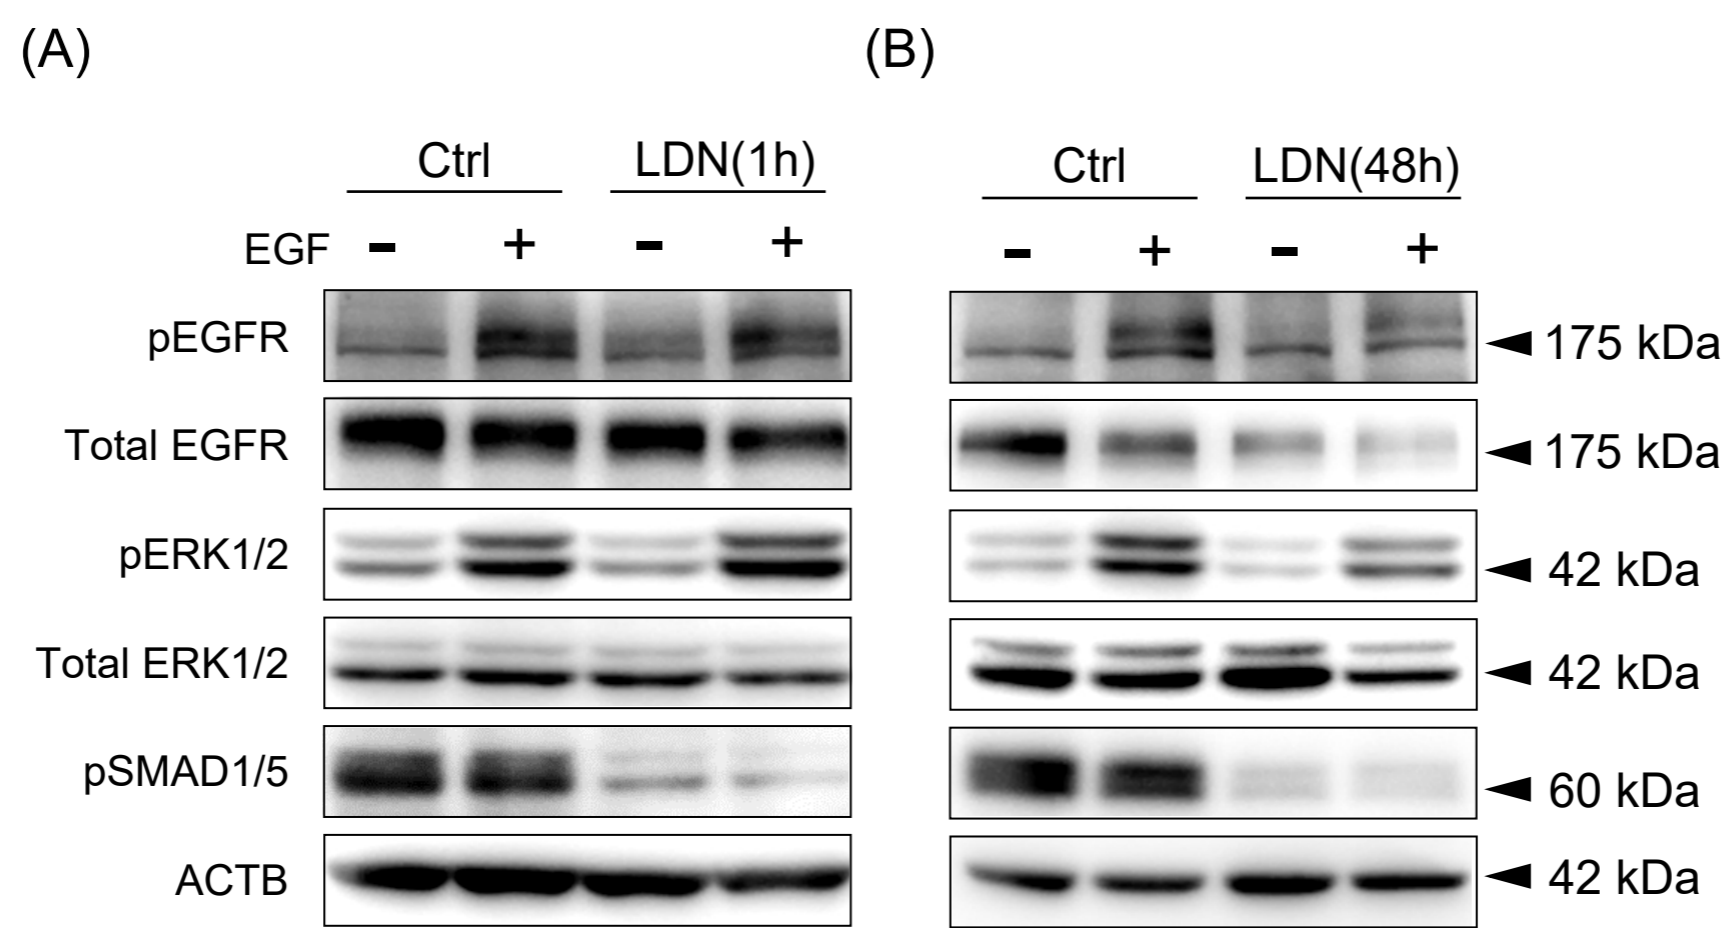

FIGURE S4. Immunoblotting analysis of CRC organoids cultured in the presence (LDN) or absence (Ctrl) of 0.1  $\mu$ M LDN for 1 hour (A) or 48 hours (B) followed by 50 ng/ml EGF for 5 minutes. Proteins were detected with indicated antibodies.

Figure S5

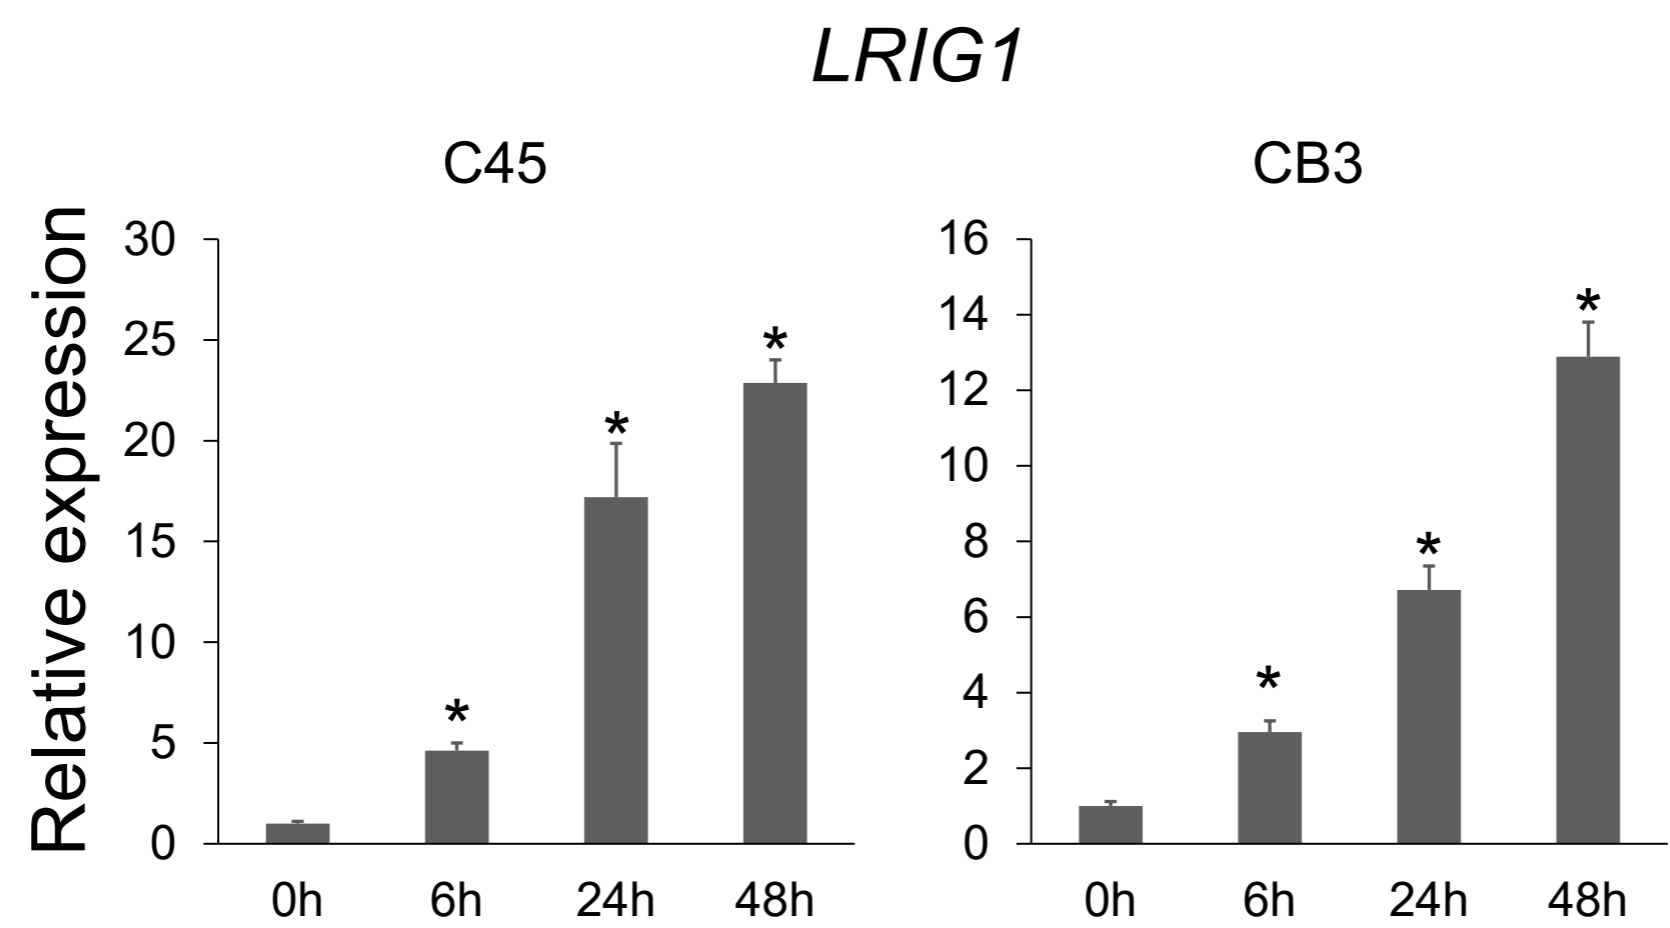

FIGURE S5. Gene expression of *LRIG1* in CRC organoids treated with LDN. The expression level was normalized to control (Ctrl) in each organoid and time point. N = 3 for each condition. Data are presented as mean + SD. Statistical comparisons were made for each control condition. \* P < 0.01, t-test with Bonferroni correction.

Figure S6

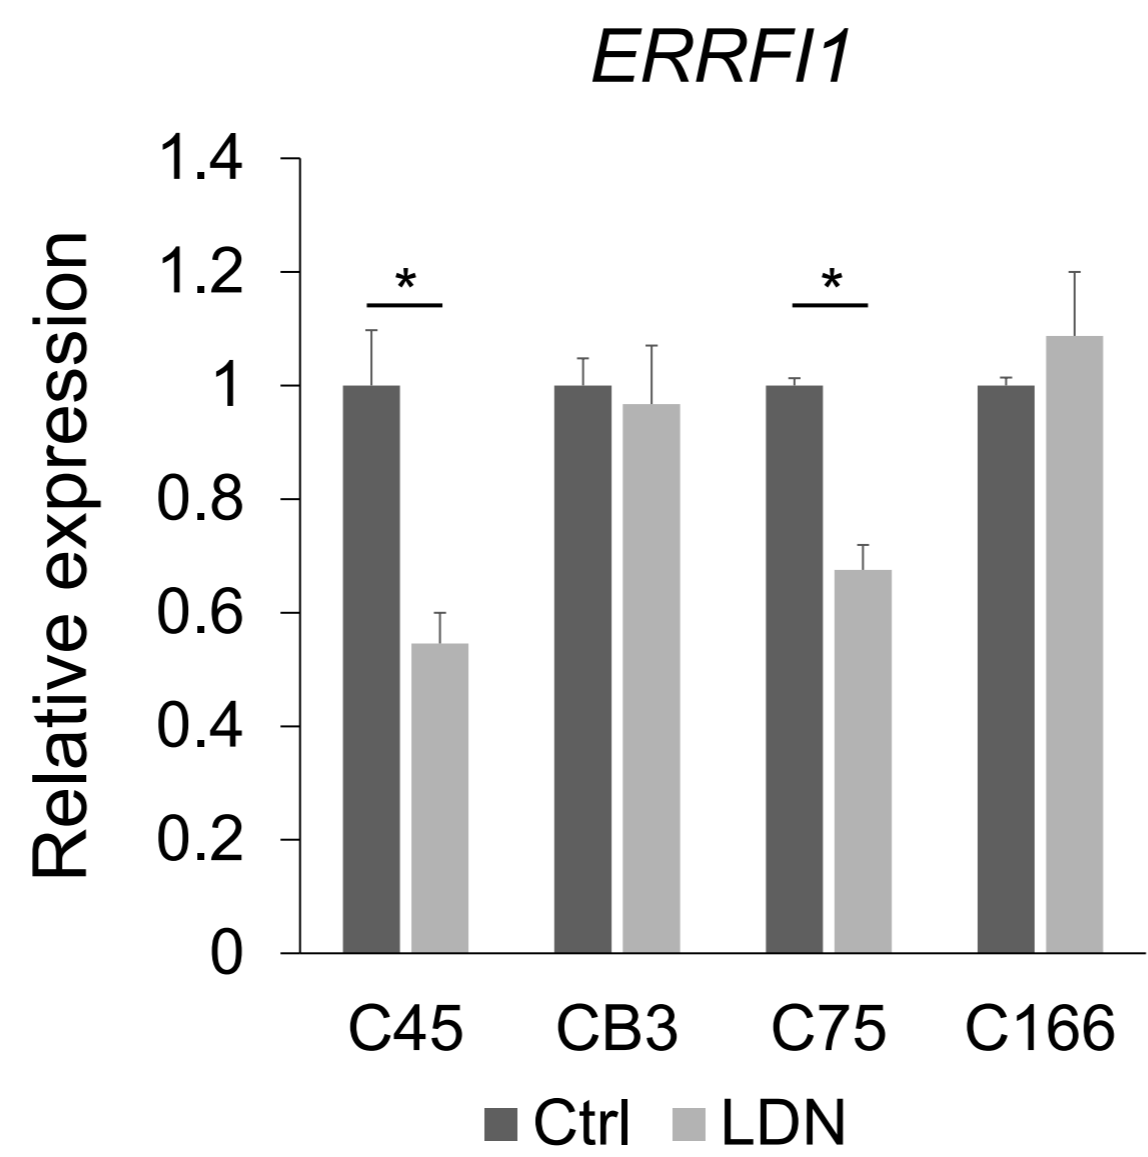

FIGURE S6. Gene expression of *ERRFI1* in CRC organoids treated with LDN. The expression level was normalized to control (Ctrl) in each organoid. N = 3 for each condition. Data are presented as mean + SD. Statistical comparisons were made for each control condition. \* P < 0.001, t-test with Bonferroni correction.

Figure S7

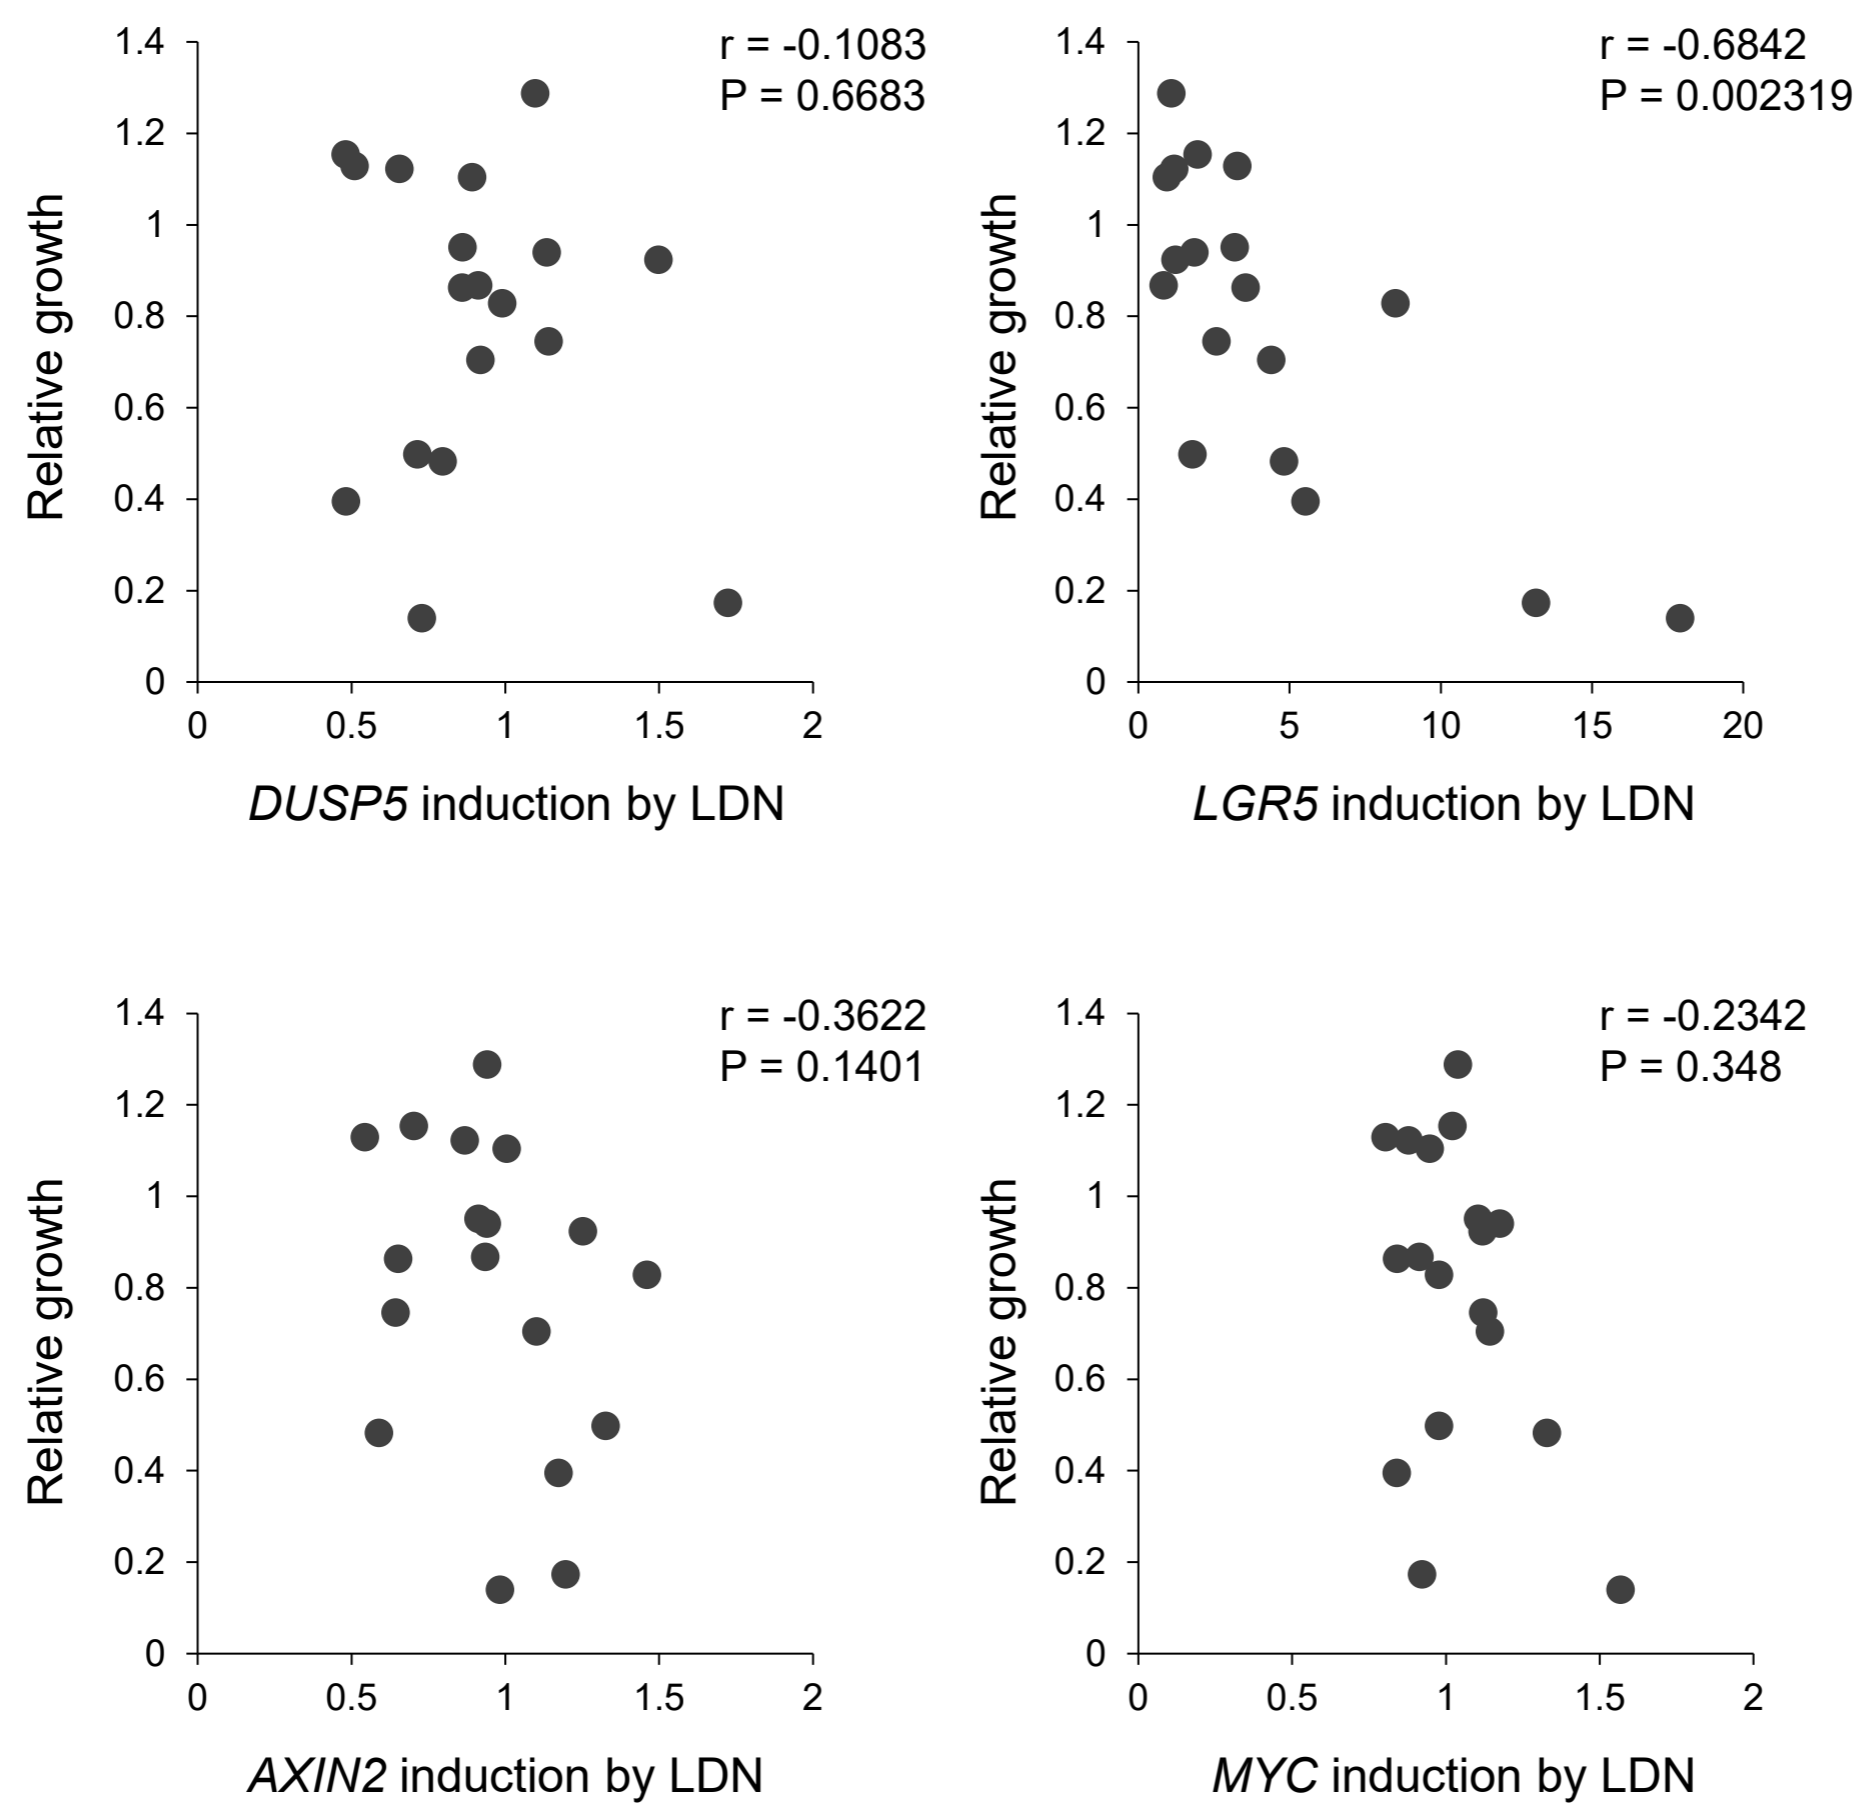

FIGURE S7. Scatter plot showing the correlation of organoid growth and *DUSP5*, *LGR5*, *AXIN2*, and *MYC* induction in the presence of 0.1  $\mu$ M LDN relative to the LDN-free condition. Each dot represents an individual CRC organoid line (N=18).  $r$ , Spearman's rank correlation coefficient;  $P$  value, Spearman's rank correlation test.

Figure S8

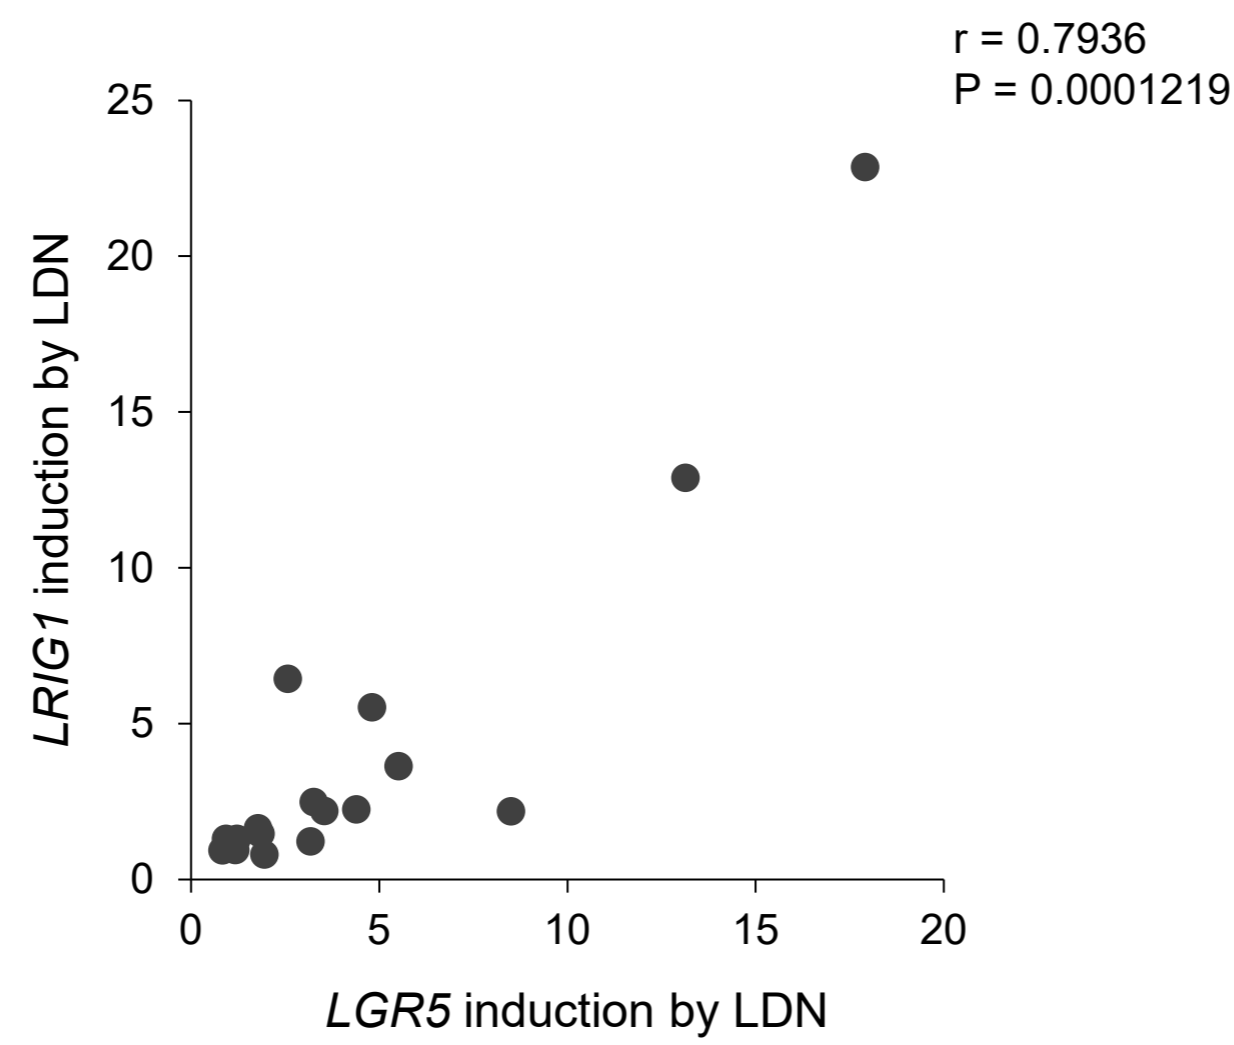

FIGURE S8. Scatter plot showing the correlation of *LRIG1* and *LGR5* induction in the presence of 0.1  $\mu$ M LDN relative to the LDN-free condition. Each dot represents an individual CRC organoid line (N=18).  $r$ , Spearman's rank correlation coefficient;  $P$  value, Spearman's rank correlation test.

Figure S9

| Sample ID | LDN (0.1μM)  |                        | Mutational status of organoids |      |      |      |        |      |       |        |      |      |       |
|-----------|--------------|------------------------|--------------------------------|------|------|------|--------|------|-------|--------|------|------|-------|
|           | growth ratio | <i>LRIG1</i> induction | APC                            | TP53 | KRAS | BRAF | PIK3CA | AKT1 | SMAD4 | CTNNB1 | LTN1 | MLH1 | FBXW7 |
| KUC19     | 1.287525597  | 0.999455014            | Mut                            | WT   | Mut  | WT   | WT     | WT   | Mut   | WT     | WT   | WT   | WT    |
| C75       | 1.153373842  | 0.804953166            | Mut                            | WT   | Mut  | WT   | WT     | Mut  | WT    | WT     | WT   | WT   | WT    |
| C132      | 1.128608715  | 2.487417965            | Mut                            | WT   | WT   | WT   | Mut    | WT   | WT    | WT     | Mut  | WT   | WT    |
| KUC16     | 1.122026864  | 0.951780056            | Mut                            | Mut  | WT   | WT   | WT     | WT   | Mut   | WT     | WT   | WT   | WT    |
| C120      | 1.103893588  | 1.311911342            | WT                             | WT   | WT   | Mut  | Mut    | WT   | WT    | WT     | WT   | WT   | WT    |
| KUC17     | 0.950358478  | 1.228127066            | Mut                            | Mut  | Mut  | WT   | WT     | WT   | Mut   | WT     | Mut  | WT   | WT    |
| C166      | 0.939583878  | 1.473004254            | Mut                            | Mut  | WT   | WT   | WT     | WT   | WT    | WT     | WT   | Mut  | Mut   |
| C191      | 0.923064563  | 1.312232253            | WT                             | Mut  | WT   | WT   | WT     | WT   | Mut   | Mut    | WT   | WT   | WT    |
| C138      | 0.867100823  | 0.939548321            | Mut                            | Mut  | Mut  | WT   | WT     | WT   | Mut   | WT     | WT   | WT   | WT    |
| C111      | 0.862624559  | 2.19993762             | Mut                            | Mut  | WT   | WT   | WT     | WT   | WT    | WT     | WT   | WT   | WT    |
| KUC21     | 0.828055279  | 2.189574955            | Mut                            | Mut  | Mut  | WT   | WT     | WT   | WT    | WT     | WT   | WT   | WT    |
| KUC22     | 0.745287972  | 6.438410824            | Mut                            | Mut  | WT   | WT   | Mut    | WT   | WT    | WT     | WT   | WT   | WT    |
| C97       | 0.704131701  | 2.256117353            | WT                             | Mut  | Mut  | WT   | Mut    | WT   | WT    | WT     | WT   | WT   | WT    |
| KUC3      | 0.497852501  | 1.646142092            | Mut                            | Mut  | WT   | WT   | WT     | WT   | WT    | WT     | WT   | WT   | WT    |
| C324      | 0.482312897  | 5.523302072            | Mut                            | WT   | WT   | WT   | WT     | WT   | WT    | WT     | WT   | WT   | WT    |
| C307      | 0.394814617  | 3.634832505            | Mut                            | Mut  | Mut  | WT   | Mut    | WT   | WT    | WT     | WT   | WT   | WT    |
| CB3       | 0.173005112  | 12.88706856            | Mut                            | Mut  | Mut  | WT   | WT     | WT   | WT    | WT     | WT   | WT   | WT    |
| C45       | 0.139401236  | 22.85927219            | Mut                            | Mut  | Mut  | WT   | WT     | WT   | WT    | WT     | WT   | WT   | WT    |

FIGURE S9. Growth ratio and *LRIG1* expression under treatment with 0.1 μM LDN relative to vehicle control for each of 18 CRC organoid lines are presented with colors indicating lowest (blue) to highest (red), along with the status of detected mutation. The list is sorted by growth ratio.
